# Supplementary material
Source: PubMed Central journal article supplement (PMC5814989)
Supplement: jamacardiol-2-516-s001.pdf [file jamacardiol-2-516-s001.pdf]

## Supplementary Online Content

Willeit K, Pechlaner R, Willeit P, et al. Association between vascular cell adhesion molecule 1 and atrial fibrillation. *JAMA Cardiol*. Published online March 29, 2017. doi:10.1001/jamacardio.2017.0064

**eMethods.** Detailed Methodology

**eTable 1.** Associations Between 75 Markers of Inflammation, Immune Activation, or Endothelial Dysfunction and Incident Atrial Fibrillation in the Bruneck Study

**eTable 2.** Baseline Characteristics in the SAPHIR study

**eFigure 1.** Penalized Spline Fit of the Association Between Soluble Vascular Cell Adhesion Molecule 1 and Incident Atrial Fibrillation in the Bruneck Study

**eFigure 2.** Mechanisms and Epidemiological Evidence Linking Vascular Cell Adhesion Molecule 1 to Atrial Fibrillation

This supplementary material has been provided by the authors to give readers additional information about their work.

**eMethods.** Detailed Methodology

**Subject characteristics in the Bruneck Study:** The study protocol included a clinical examination and standardized questionnaires on medical history, life-style behaviours and vascular risk factors<sup>1-5</sup>. Subjects were coded as current smokers or non-smokers (including former smokers). The number of pack-years was noted for each smoker and former smoker. Alcohol consumption was quantified in grams per day. Body mass index was calculated as weight (kg) divided by height (m)<sup>2</sup>. Systolic and diastolic blood pressures were means of three independent measurements, each of which was taken after the participant had been sitting for 10 minutes. Hypertension was defined as systolic blood pressure  $\geq 140$  mmHg or diastolic blood pressure  $\geq 90$  mmHg, or the use of antihypertensive drugs. Diabetes mellitus was determined as fasting plasma glucose level  $\geq 126$  mg/dL ( $\geq 7.0$  mmol/L) or the use of anti-diabetic medication. Glomerular filtration rate was estimated using the CKD-EPI equation. Socioeconomic status was defined according to a 3-category scale (low, medium, high) based on information about occupational status and educational level of the person with the highest income in the household. High socioeconomic status was assumed if the participant had  $\geq 12$  years of education or an occupation with an average monthly income  $\geq \$2,000$  (baseline salary before tax). Low socioeconomic status was defined by  $\leq 8$  years of education or an average monthly income  $\leq \$1,000$ . Atherosclerosis was assessed by carotid duplex ultrasound according to a standardized protocol, as described previously<sup>5</sup>. The present study uses a contrast of 0 (no plaque) versus 1 (presence of one or more plaque in one of the 8 segments of the right and left carotid arteries). PR interval (in milliseconds), corrected QT interval (in milliseconds) and P axis (in degrees) were determined automatically from resting 12-lead ECGs (Hewlett Packard M1700A). P-wave terminal force, defined as the product of the duration of the negative P-wave deflection (in

milliseconds) in lead V1 multiplied by the absolute value of its amplitude ( $\mu\text{V}$ ), was an average of three consecutive cardiac cycles measured manually by two observers. Prolonged PR interval and corrected QT interval, P wave axis  $<30^\circ$  and high values of P-wave terminal force have been associated with atrial abnormality in previous studies<sup>6-9</sup>. Myocardial infarction was deemed confirmed when World Health Organization criteria for definite disease status were met<sup>10</sup>. Symptoms suggestive of heart failure were classified using the New York Heart Association classification<sup>11</sup>. Ischemic stroke and transient ischemic attack (TIA) were classified according to the criteria of the National Survey of Stroke<sup>12</sup>. The situation in Bruneck is unique in that medical care is primarily provided in the Bruneck hospital to which residents of Bruneck usually are referred by general practitioners for diagnostic tests. Additionally, population mobility in this area has been low over the past 20 years. Given the shared pathomechanisms and risk factors, TIAs were included in the ischemic stroke endpoint if the diagnosis was made with high accuracy (medical record-confirmed TIA).

**Assessment of laboratory parameters in the Bruneck Study:** Measurement of sVCAM-1 was performed in samples stored at  $-70^\circ\text{C}$  for 11 years without any cycle of thawing and refreezing. Comparison of this assessment with sVCAM-1 levels measured in 1993 after only 2.5 years after sampling ( $n=84$ ) yielded strong evidence of a high stability of sVCAM-1 under the storage conditions applied (mean sVCAM-1 in the 1993 and 2001 assessment, 679.5 and 724.6 ng/mL, difference [95%CI] 45.1 [-9.8 to 100.0],  $P=0.11$ ).

Laboratory parameters were measured in baseline samples using standard procedures, as described previously<sup>1-5</sup>. High-sensitivity cardiac troponin T (hs-cTnT) was assessed using highly sensitive reagents on an Elecsys® 2010 analyser (Roche Diagnostics, Burgess Hill, UK)<sup>13</sup>. Values of hs-cTnT were categorized into groups of

undetectable and tertiles of detectable hs-cTnT levels according to a recent publication of the Cardiovascular Health Study<sup>14</sup>. Other markers of inflammation, immune activation, or endothelial dysfunction were determined in samples collected during the 2000 follow-up by Proximity Extension Assay (PEA)<sup>15</sup>, using Proseek Multiplex CVD I<sup>96x96</sup> and Proseek Multiplex Inflammation I<sup>96x96</sup> reagents kits (Olink Bioscience, Uppsala, Sweden). Each of these assays yielded 92 protein measurements. Of 26 proteins that were measured in both assays only measurements from the Inflammation assay were considered, 3 proteins were discarded because they had already been measured in 1990, and 23 proteins were discarded because they had more than 50% nondetects. This resulted in 132 candidate proteins, from which proteins potentially relevant to inflammation, immune activation, or endothelial dysfunction were selected as those annotated with GO terms that were partially matched by any of the character strings "inflamm", "immun", or "endothel", for a final set of 75 proteins measured in 2000. All variables were log<sub>e</sub>-transformed and standardised to unit variance.

**Methodological details of the SAPHIR Study:** At baseline and during the follow-up visit, all participants underwent a comprehensive clinical assessment including patient history, physical examination, 12-lead standard ECG, and laboratory tests<sup>16,17</sup>. Definitions of hypertension, body mass index, diabetes, smoking, atherosclerosis and ECG variables (PR interval, corrected QT interval) were the very same as used in the Bruneck Study. Alcohol consumption was quantified as the number of standard drinks per week (10-12 g of alcohol per drink). Information on AF was available in 1629 participants (92%) as of September 2013 and ascertained by 1) ECGs recorded at baseline and during the follow-up study visit, 2) ECGs recorded during interim hospitalizations and outpatient visits to the hospital, 3) self-report of physician-diagnosed AF in follow-up questionnaires, and 4) reviewing all medical records for a diagnosis of

AF. Laboratory parameters were assessed by standard methods. Measurement of sVCAM-1 were performed in samples stored at  $-70^{\circ}\text{C}$  for a mean of 15 years (baseline examination) and 10 years (follow-up examination) without any cycle of thawing and refreezing and using the same enzyme-linked immunosorbent assay as in the Bruneck Study. Absolute values of sVCAM-1 in the baseline and follow-up samples of the same individuals were similar (mean difference [95% CI] 29.5 [-2.4 to 61.4]  $P=0.072$ ) and highly correlated ( $r=0.60$ ).

In SAPHIR, we used a nested case-control design for replication purposes. After excluding individuals with AF at baseline, 60 subjects with new-onset AF formed the case group (all detected by medical records). To each case we matched two controls free of AF with identical age ( $\pm 1$  year) and sex. For cases with AF manifestation between baseline and the follow-up examination and the respective controls we used levels of sVCAM-1 measured from baseline samples while for cases with AF manifestation after the follow-up examination and the respective controls we used levels of sVCAM-1 measured from follow-up samples. The quantity of frozen blood was insufficient in 6 control individuals, thus 60 cases and 114 controls were finally analysed. The association between baseline characteristics and incident AF was analysed with conditional logistic regression analysis.

**eTable 1. Associations Between 75 Markers of Inflammation, Immune Activation, or Endothelial Dysfunction and Incident Atrial Fibrillation in the Bruneck Study.**

| Protein | Full name                             | Unadjusted            |         |                      | Adjusted for age and sex |         |                      |
|---------|---------------------------------------|-----------------------|---------|----------------------|--------------------------|---------|----------------------|
|         |                                       | Hazard ratio (95% CI) | P value | <sup>a</sup> P value | Hazard ratio (95% CI)    | P value | <sup>a</sup> P value |
| IL-6    | Interleukin-6                         | 1.33 (1.16-1.51)      | <0.001  | 0.003                | 1.19 (0.98-1.45)         | 0.08    | >0.99                |
| TNF-R2  | Tumor necrosis factor receptor 2      | 1.53 (1.23-1.91)      | <0.001  | 0.02                 | 1.16 (0.91-1.48)         | 0.23    | >0.99                |
| FABP4   | Fatty acid-binding protein, adipocyte | 1.50 (1.19-1.90)      | <0.001  | 0.06                 | 1.41 (1.07-1.87)         | 0.02    | >0.99                |
| ADA     | Adenosine Deaminase                   | 0.65 (0.50-0.84)      | <0.001  | 0.05                 | 0.80 (0.61-1.04)         | 0.09    | >0.99                |
| IL27-A  | Interleukin-27 subunit alpha          | 1.48 (1.16-1.88)      | 0.002   | 0.15                 | 1.24 (0.97-1.58)         | 0.08    | >0.99                |
| TNF-R1  | Tumor necrosis factor receptor 1      | 1.44 (1.14-1.82)      | 0.002   | 0.15                 | 1.06 (0.83-1.34)         | 0.67    | >0.99                |
| LOX-1   | Lectin-like oxidized LDL receptor 1   | 1.38 (1.12-1.71)      | 0.003   | 0.23                 | 1.25 (1.00-1.58)         | 0.05    | >0.99                |
| OSM     | Oncostatin-M                          | 1.35 (1.10-1.65)      | 0.004   | 0.30                 | 1.30 (1.05-1.62)         | 0.02    | >0.99                |
| PIGF    | Placenta growth factor                | 1.36 (1.09-1.70)      | 0.007   | 0.53                 | 1.11 (0.87-1.41)         | 0.41    | >0.99                |
| EN-RAGE | Protein S100-A12                      | 1.33 (1.07-           |         | 0.68                 | 1.23 (0.99-              | 0.06    | >0.99                |

|                    |                                                              |                  |       |       |                  |      |       |
|--------------------|--------------------------------------------------------------|------------------|-------|-------|------------------|------|-------|
|                    |                                                              | 1.65)            | 0.009 |       | 1.53)            |      | 9     |
| FGF-19             | Fibroblast growth factor 19                                  | 0.74 (0.58-0.94) | 0.02  | >0.99 | 0.82 (0.64-1.05) | 0.11 | >0.99 |
| CXCL10             | C-X-C motif chemokine 10                                     | 1.30 (1.05-1.62) | 0.02  | >0.99 | 0.96 (0.75-1.24) | 0.78 | >0.99 |
| ST2                | ST2 protein                                                  | 1.34 (1.07-1.67) | 0.01  | 0.83  | 1.19 (0.94-1.50) | 0.14 | >0.99 |
| CXCL9              | C-X-C motif chemokine 9                                      | 1.31 (1.06-1.62) | 0.01  | 0.98  | 0.88 (0.68-1.14) | 0.33 | >0.99 |
| CHI3L1             | Chitinase-3-like protein 1                                   | 1.26 (1.02-1.57) | 0.04  | >0.99 | 0.97 (0.76-1.25) | 0.84 | >0.99 |
| IL-12B             | Interleukin-12 subunit beta                                  | 1.27 (1.00-1.61) | 0.05  | >0.99 | 1.27 (0.99-1.64) | 0.06 | >0.99 |
| CD40               | CD40L receptor                                               | 0.78 (0.60-1.00) | 0.05  | >0.99 | 0.88 (0.68-1.15) | 0.35 | >0.99 |
| ECP                | Eosinophil cationic protein                                  | 1.26 (0.98-1.61) | 0.07  | >0.99 | 1.13 (0.88-1.44) | 0.33 | >0.99 |
| TRAIL              | TNF-related apoptosis-inducing ligand                        | 0.80 (0.63-1.02) | 0.07  | >0.99 | 1.07 (0.82-1.39) | 0.64 | >0.99 |
| CCL23              | C-C motif chemokine 23                                       | 1.24 (0.97-1.59) | 0.08  | >0.99 | 1.16 (0.91-1.48) | 0.22 | >0.99 |
| PECAM-1            | Platelet endothelial cell adhesion molecule                  | 1.21 (0.97-1.52) | 0.10  | >0.99 | 1.06 (0.83-1.34) | 0.65 | >0.99 |
| GAL                | Galanin peptides                                             | 0.82 (0.65-1.04) | 0.11  | >0.99 | 0.95 (0.75-1.21) | 0.68 | >0.99 |
| LAP TGF- $\beta$ 1 | Latency-associated peptide transforming growth factor beta 1 | 0.81 (0.62-1.06) | 0.12  | >0.99 | 0.90 (0.68-1.18) | 0.44 | >0.99 |
| MCP-4              | Monocyte chemotactic protein 4                               | 0.83 (0.65-1.06) | 0.13  | >0.99 | 0.84 (0.65-1.07) | 0.15 | >0.99 |
| BDNF               | Brain-derived neurotrophic factor                            | 0.82 (0.64-      | 0.13  | >0.99 | 0.95 (0.74-      | 0.68 | >0.99 |

|         |                                                    |                  |      |       |                  |      |       |
|---------|----------------------------------------------------|------------------|------|-------|------------------|------|-------|
|         |                                                    | 1.06)            |      |       | 1.22)            |      | 9     |
| TF      | Tissue factor                                      | 1.20 (0.95-1.52) | 0.13 | >0.99 | 1.00 (0.78-1.27) | 0.97 | >0.99 |
| CTSL1   | Cathepsin L1                                       | 1.19 (0.94-1.49) | 0.14 | >0.99 | 1.09 (0.86-1.39) | 0.47 | >0.99 |
| IL-16   | Interleukin-16                                     | 1.19 (0.94-1.51) | 0.15 | >0.99 | 1.14 (0.89-1.46) | 0.31 | >0.99 |
| EGF     | Epidermal growth factor                            | 1.18 (0.94-1.49) | 0.15 | >0.99 | 1.05 (0.83-1.34) | 0.67 | >0.99 |
| TNFB    | TNF-beta                                           | 0.85 (0.67-1.07) | 0.16 | >0.99 | 1.02 (0.78-1.32) | 0.91 | >0.99 |
| CXCL11  | C-X-C motif chemokine 11                           | 1.17 (0.94-1.45) | 0.17 | >0.99 | 1.04 (0.82-1.34) | 0.73 | >0.99 |
| IL-1ra  | Interleukin-1 receptor antagonist protein          | 1.16 (0.93-1.44) | 0.18 | >0.99 | 1.16 (0.93-1.45) | 0.20 | >0.99 |
| MCP-2   | Monocyte chemotactic protein 2                     | 1.16 (0.93-1.43) | 0.18 | >0.99 | 1.00 (0.79-1.26) | 0.99 | >0.99 |
| CCL3    | C-C motif chemokine 3                              | 1.12 (0.93-1.36) | 0.23 | >0.99 | 0.95 (0.75-1.20) | 0.66 | >0.99 |
| CD40-L  | CD40 ligand                                        | 1.14 (0.91-1.43) | 0.25 | >0.99 | 1.06 (0.84-1.35) | 0.60 | >0.99 |
| TNFSF14 | Tumor necrosis factor ligand superfamily member 14 | 0.85 (0.65-1.12) | 0.25 | >0.99 | 0.94 (0.70-1.24) | 0.65 | >0.99 |
| CCL20   | C-C motif chemokine 20                             | 1.13 (0.91-1.41) | 0.26 | >0.99 | 1.11 (0.88-1.40) | 0.40 | >0.99 |
| β-NGF   | Beta-nerve growth factor                           | 1.11 (0.93-1.33) | 0.26 | >0.99 | 0.96 (0.73-1.25) | 0.76 | >0.99 |
| CXCL6   | C-X-C motif chemokine 6                            | 0.87 (0.68-1.12) | 0.27 | >0.99 | 0.96 (0.74-1.23) | 0.73 | >0.99 |
| MCP-3   | Monocyte chemotactic protein 3                     | 1.14 (0.90-      | 0.28 | >0.99 | 0.88 (0.67-      | 0.36 | >0.99 |



|         |                                                     |                  |      |       |                  |      |       |
|---------|-----------------------------------------------------|------------------|------|-------|------------------|------|-------|
|         |                                                     | 1.43)            |      |       | 1.16)            |      | 9     |
| IL-18R1 | Interleukin-18 receptor 1                           | 0.88 (0.69-1.12) | 0.29 | >0.99 | 1.05 (0.82-1.36) | 0.69 | >0.99 |
| VEGF-A  | Vascular endothelial growth factor A                | 1.12 (0.89-1.41) | 0.34 | >0.99 | 1.01 (0.79-1.28) | 0.95 | >0.99 |
| SCF     | Stem cell factor                                    | 1.13 (0.87-1.45) | 0.37 | >0.99 | 1.22 (0.93-1.58) | 0.15 | >0.99 |
| HSP 27  | Heat shock 27 kDa protein                           | 1.11 (0.88-1.39) | 0.39 | >0.99 | 1.04 (0.81-1.32) | 0.77 | >0.99 |
| FAS     | Tumor necrosis factor receptor superfamily member 6 | 1.09 (0.88-1.35) | 0.41 | >0.99 | 1.01 (0.79-1.28) | 0.96 | >0.99 |
| CCL28   | C-C motif chemokine 28                              | 1.10 (0.87-1.39) | 0.43 | >0.99 | 0.91 (0.69-1.20) | 0.49 | >0.99 |
| SIRT2   | SIR2-like protein 2                                 | 0.91 (0.71-1.16) | 0.43 | >0.99 | 0.94 (0.72-1.23) | 0.66 | >0.99 |
| NEMO    | NF-kappa-B essential modulator                      | 1.10 (0.87-1.39) | 0.44 | >0.99 | 0.94 (0.74-1.21) | 0.64 | >0.99 |
| FGF-23  | Fibroblast growth factor 23                         | 1.09 (0.86-1.39) | 0.48 | >0.99 | 1.04 (0.80-1.36) | 0.75 | >0.99 |
| IL-17C  | Interleukin-17C                                     | 1.08 (0.86-1.35) | 0.50 | >0.99 | 0.99 (0.78-1.26) | 0.93 | >0.99 |
| IL-8    | Interleukin-8                                       | 1.07 (0.86-1.35) | 0.54 | >0.99 | 0.86 (0.65-1.15) | 0.30 | >0.99 |
| CCL4    | C-C motif chemokine 4                               | 1.07 (0.85-1.34) | 0.56 | >0.99 | 0.96 (0.76-1.20) | 0.69 | >0.99 |
| CXCL1   | C-X-C motif chemokine 1                             | 0.93 (0.74-1.18) | 0.56 | >0.99 | 0.98 (0.76-1.27) | 0.89 | >0.99 |
| IL-18   | Interleukin-18                                      | 1.07 (0.85-1.35) | 0.56 | >0.99 | 1.01 (0.80-1.28) | 0.92 | >0.99 |
| SRC     | Proto-oncogene tyrosine-protein kinase Src          | 1.07 (0.84-      | 0.58 | >0.99 | 1.05 (0.82-      | 0.69 | >0.99 |

|                |                                                  |                  |      |       |                  |      |       |
|----------------|--------------------------------------------------|------------------|------|-------|------------------|------|-------|
|                |                                                  | 1.37)            |      |       | 1.36)            |      | 9     |
| CCL19          | C-C motif chemokine 19                           | 0.94 (0.73-1.21) | 0.63 | >0.99 | 0.96 (0.75-1.22) | 0.71 | >0.99 |
| CCL25          | C-C motif chemokine 25                           | 0.95 (0.75-1.20) | 0.65 | >0.99 | 0.91 (0.72-1.15) | 0.43 | >0.99 |
| TIE2           | Angiopoietin-1 receptor                          | 0.95 (0.75-1.20) | 0.67 | >0.99 | 1.12 (0.89-1.41) | 0.32 | >0.99 |
| HB-EGF         | Heparin-binding EGF-like growth factor           | 1.05 (0.83-1.32) | 0.70 | >0.99 | 0.96 (0.74-1.24) | 0.75 | >0.99 |
| VEGF-D         | Vascular endothelial growth factor D             | 0.96 (0.77-1.21) | 0.75 | >0.99 | 1.06 (0.84-1.36) | 0.61 | >0.99 |
| IL-6RA         | Interleukin-6 receptor subunit alpha             | 1.04 (0.82-1.32) | 0.75 | >0.99 | 1.05 (0.84-1.33) | 0.66 | >0.99 |
| RAGE           | Receptor for advanced glycosylation end products | 0.97 (0.76-1.23) | 0.78 | >0.99 | 1.15 (0.90-1.47) | 0.27 | >0.99 |
| TWEAK          | Tumor necrosis factor superfamily, member 12     | 0.97 (0.76-1.23) | 0.81 | >0.99 | 0.94 (0.74-1.18) | 0.58 | >0.99 |
| IL-7           | Interleukin-7                                    | 0.98 (0.77-1.24) | 0.84 | >0.99 | 0.93 (0.70-1.23) | 0.60 | >0.99 |
| PDGF Subunit B | Platelet-derived growth factor subunit B         | 1.02 (0.81-1.30) | 0.85 | >0.99 | 1.01 (0.80-1.29) | 0.91 | >0.99 |
| MIP-1A         | Macrophage inflammatory protein 1-alpha          | 1.02 (0.81-1.29) | 0.86 | >0.99 | 0.85 (0.65-1.11) | 0.24 | >0.99 |
| CASP-8         | Caspase 8                                        | 0.98 (0.77-1.24) | 0.86 | >0.99 | 0.92 (0.71-1.20) | 0.55 | >0.99 |
| CX3CL1         | Fractalkine                                      | 1.02 (0.80-1.30) | 0.86 | >0.99 | 0.97 (0.75-1.24) | 0.80 | >0.99 |
| CSF-1          | Macrophage colony-stimulating factor 1           | 1.02 (0.80-1.29) | 0.89 | >0.99 | 1.09 (0.85-1.40) | 0.51 | >0.99 |
| IL-10          | Interleukin-10                                   | 0.98 (0.78-      | 0.89 | >0.99 | 1.00 (0.78-      | 0.98 | >0.99 |

|                                                                                                                                                                                                                                                                                                                                                                                                                                 |                                      |                  |      |       |                  |      |       |
|---------------------------------------------------------------------------------------------------------------------------------------------------------------------------------------------------------------------------------------------------------------------------------------------------------------------------------------------------------------------------------------------------------------------------------|--------------------------------------|------------------|------|-------|------------------|------|-------|
|                                                                                                                                                                                                                                                                                                                                                                                                                                 |                                      | 1.25)            |      |       | 1.29)            |      | 9     |
| PAR-1                                                                                                                                                                                                                                                                                                                                                                                                                           | Proteinase-activated receptor 1      | 0.99 (0.78-1.25) | 0.91 | >0.99 | 0.90 (0.69-1.16) | 0.40 | >0.99 |
| IL-10RB                                                                                                                                                                                                                                                                                                                                                                                                                         | Interleukin-10 receptor subunit beta | 1.01 (0.79-1.29) | 0.93 | >0.99 | 0.96 (0.75-1.23) | 0.76 | >0.99 |
| CXCL5                                                                                                                                                                                                                                                                                                                                                                                                                           | C-X-C motif chemokine 5              | 1.01 (0.80-1.27) | 0.95 | >0.99 | 1.05 (0.80-1.36) | 0.74 | >0.99 |
| CCL11                                                                                                                                                                                                                                                                                                                                                                                                                           | Eotaxin-1                            | 0.99 (0.78-1.27) | 0.96 | >0.99 | 0.91 (0.71-1.17) | 0.48 | >0.99 |
| Gal-3                                                                                                                                                                                                                                                                                                                                                                                                                           | Galectin-3                           | 1.00 (0.79-1.26) | 0.99 | >0.99 | 0.96 (0.75-1.23) | 0.76 | >0.99 |
| <p>Markers were assessed recently from samples collected in 2000 with 10 years of follow-up (2000-2010). Numbers of events and total subjects were 69 and 637. Markers are log<sub>e</sub>-transformed for analysis und hazard ratios are given for a 1-SD higher concentration in each marker. Protein order is arranged by descending significance in unadjusted models.</p> <p><sup>a</sup>Bonferroni-corrected P value.</p> |                                      |                  |      |       |                  |      |       |

**eTable 2. Baseline Characteristics in the SAPHIR Study.**

| <b>Characteristics</b>             | <b>Cases<br/>(n=60)</b>     | <b>Controls<br/>(n=114)</b> | <b>P Value<sup>a</sup></b> |
|------------------------------------|-----------------------------|-----------------------------|----------------------------|
| Age, years                         | 54.3±5.2                    | 54.2±5.1                    | Matched                    |
| Female sex, n (%)                  | 24 (40.0)                   | 45 (39.5)                   | Matched                    |
| Diabetes mellitus, n (%)           | 1 (1.7)                     | 4 (3.5)                     | 0.98                       |
| Hypertension, n (%)                | 43 (71.7)                   | 61 (53.5)                   | 0.02                       |
| Body mass index, kg/m <sup>2</sup> | 26.9±4.8                    | 27.0±4.1                    | 0.97                       |
| Smoking, n (%)                     | 7 (11.7)                    | 18 (15.8)                   | 0.27                       |
| Alcohol, drinks/week               | 5.0±6.4                     | 4.3±5.7                     | 0.44                       |
| Atherosclerosis, n (%)             | 15 (25.0)                   | 21 (18.4)                   | 0.26                       |
| High-sensitivity CRP, mg/L         | 1.5 (0.7, 3.1) <sup>b</sup> | 1.3 (0.8, 2.8) <sup>b</sup> | 0.76                       |
| GFR, mL/min                        | 93.7±12.0                   | 92.8±11.2                   | 0.57                       |
| PR interval, ms                    | 163.7±22.0                  | 164.9±24.7                  | 0.74                       |
| cQT interval, ms                   | 406.2±27.8                  | 406.9±27.1                  | 0.87                       |

Data presented are mean±SD or n (%).

Abbreviations: cQT interval, corrected QT interval; CRP, C-reactive protein; GFR, glomerular filtration rate.

SI conversion factors: To convert CRP to nmol/L, multiply by 9.542.

<sup>a</sup>P value adjusted for age and sex.

<sup>b</sup>Median (interquartile range) is given for highly skewed variables.

**eFigure 1. Penalized Spline Fit of the Association Between Soluble Vascular Cell Adhesion Molecule 1 and Incident Atrial Fibrillation in the Bruneck Study (adjusted for age and sex).** There is an adequate fit of a linear dose-response relationship ( $P=0.004$ ) without evidence of an additional nonlinear component ( $P=0.230$ ).

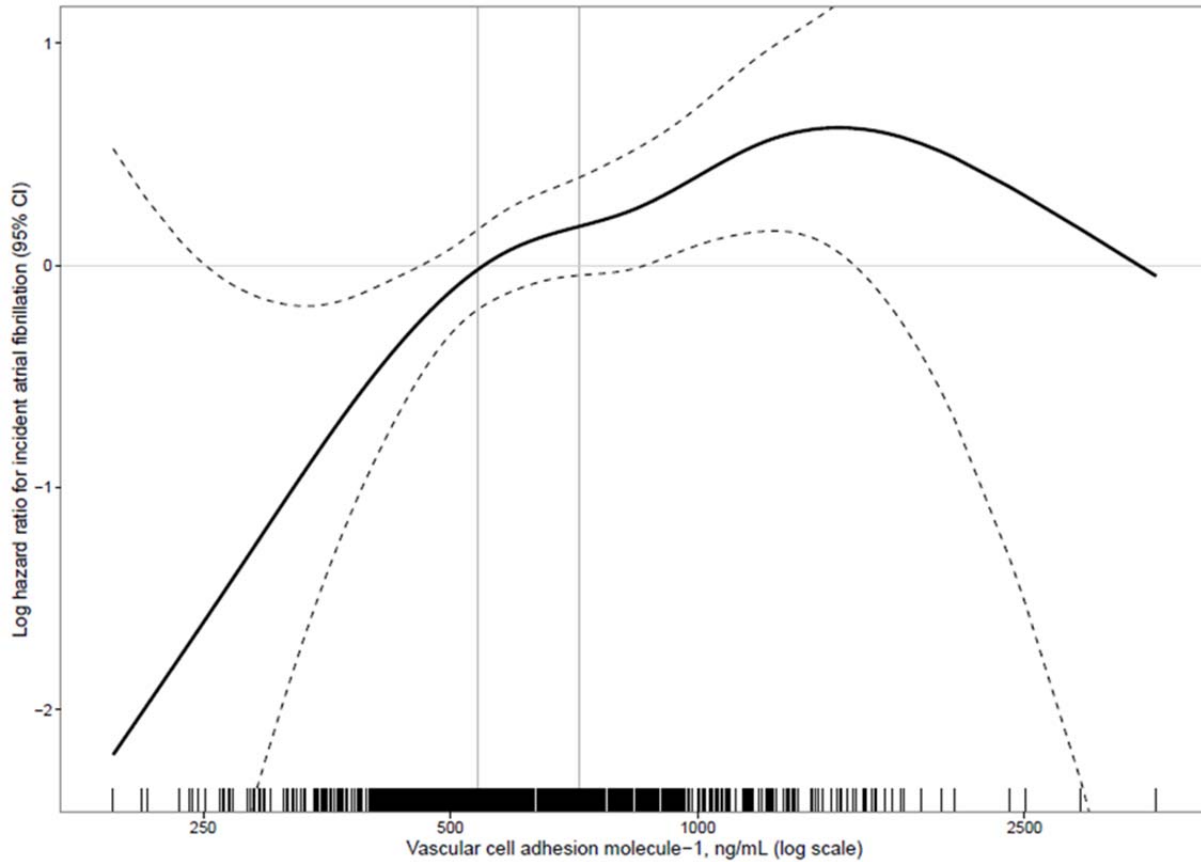

**eFigure 2. Mechanisms and Epidemiological Evidence Linking Vascular Cell Adhesion Molecule 1 to Atrial Fibrillation.**

Abbreviations: ICAM-1, intercellular adhesion molecule 1; ROS, reactive oxygen species.

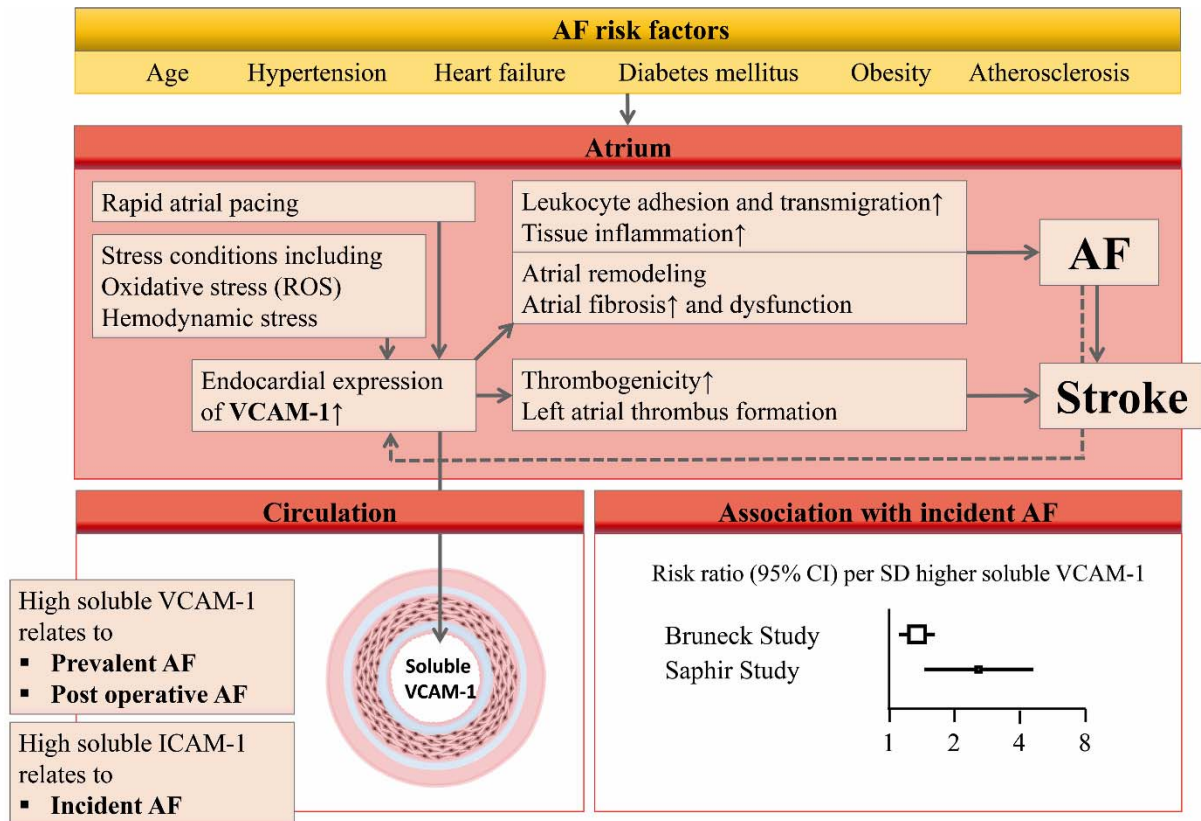

## eReferences

1. Kiechl S, Lorenz E, Reindl M, et al. Toll-like receptor 4 polymorphisms and atherogenesis. *N. Engl. J. Med.* 2002;347(3):185-192.
2. Kiechl S, Wittmann J, Giaccari A, et al. Blockade of receptor activator of nuclear factor-kappaB (RANKL) signaling improves hepatic insulin resistance and prevents development of diabetes mellitus. *Nat. Med.* 2013;19(3):358-363.
3. Schett G, Kiechl S, Bonora E, et al. Vascular cell adhesion molecule 1 as a predictor of severe osteoarthritis of the hip and knee joints. *Arthritis Rheum.* 2009;60(8):2381-2389.
4. Willeit J, Kiechl S, Oberhollenzer F, et al. Distinct risk profiles of early and advanced atherosclerosis: prospective results from the Bruneck Study. *Arterioscler. Thromb. Vasc. Biol.* 2000;20(2):529-537.
5. Willeit K, Pechlaner R, Egger G, et al. Carotid atherosclerosis and incident atrial fibrillation. *Arterioscler. Thromb. Vasc. Biol.* 2013;33(11):2660-2665.
6. Cheng M, Lu X, Huang J, Zhang S, Gu D. Electrocardiographic PR prolongation and atrial fibrillation risk: a meta-analysis of prospective cohort studies. *J. Cardiovasc. Electrophysiol.* 2015;26(1):36-41.
7. Magnani JW, Zhu L, Lopez F, et al. P-wave indices and atrial fibrillation: cross-cohort assessments from the Framingham Heart Study (FHS) and Atherosclerosis Risk in Communities (ARIC) study. *Am. Heart J.* 2015;169(1):53-61.
8. Perez MV, Dewey FE, Marcus R, et al. Electrocardiographic predictors of atrial fibrillation. *Am. Heart J.* 2009;158(4):622-628.

9. Tsao CW, Josephson ME, Hauser TH, et al. Accuracy of electrocardiographic criteria for atrial enlargement: validation with cardiovascular magnetic resonance. *J. Cardiovasc. Magn Reson.* 2008;10:7.
10. Ihd register. Report of the fifth working group. Copenhagen, denmark, 1971. 2015.
11. Remme WJ, Swedberg K. Guidelines for the diagnosis and treatment of chronic heart failure. *Eur. Heart J.* 2001;22(17):1527-1560.
12. Walker AE, Robins M, Weinfeld FD. The National Survey of Stroke. Clinical findings. *Stroke.* 1981;12(2 Pt 2 Suppl 1):I13-I44.
13. Saenger AK, Beyrau R, Braun S, et al. Multicenter analytical evaluation of a high-sensitivity troponin T assay. *Clin. Chim. Acta.* 2011;412(9-10):748-754.
14. Hussein AA, Bartz TM, Gottdiener JS, et al. Serial measures of cardiac troponin T levels by a highly sensitive assay and incident atrial fibrillation in a prospective cohort of ambulatory older adults. *Heart Rhythm.* 2015;12(5):879-885.
15. Assarsson E, Lundberg M, Holmquist G, et al. Homogenous 96-plex PEA immunoassay exhibiting high sensitivity, specificity, and excellent scalability. *PLoS. One.* 2014;9(4):e95192.
16. Kedenko L, Lamina C, Kedenko I, et al. Genetic polymorphisms at SIRT1 and FOXO1 are associated with carotid atherosclerosis in the SAPHIR cohort. *BMC. Med. Genet.* 2014;15:112.
17. Melmer A, Lamina C, Tschoner A, et al. Body adiposity index and other indexes of body composition in the SAPHIR study: association with cardiovascular risk factors. *Obesity. (Silver. Spring).* 2013;21(4):775-781.
